# Supplementary material for: Studying the excited electronic states of guanine rich DNA quadruples by quantum mechanical methods: main achievements and perspectives
Source: Royal Society of Chemistry journal article supplement (doi:10.1039/d0pp00065e), 2020-03-30

## **Studying the excited electronic states of Guanine rich DNA quadruplex by quantum mechanical methods: main achievements and perspectives.**

Lara Martínez-Fernández, Luciana Esposito and Roberto Improta

| <b><u>Supporting Information</u></b> | <b><u>Page</u></b> |
|--------------------------------------|--------------------|
|--------------------------------------|--------------------|

|           |   |
|-----------|---|
| Table S1. | 1 |
|-----------|---|

|            |   |
|------------|---|
| Figure S1. | 1 |
|------------|---|

**Table S1.** Vertical absorption energies and oscillator strengths for guanine with and without Na<sup>+</sup> atom, by using the coordination geometry depicted below, with a distance of 1 or 2 Angstroms from the tetrad plane, computed at the TD-PCM-M052X/6-31G\* level of theory.

|                |          | G/Na <sup>+</sup> 1 Å <sup>a</sup> |      | G/Na <sup>+</sup> 2 Å <sup>b</sup> |      | G                      |      |
|----------------|----------|------------------------------------|------|------------------------------------|------|------------------------|------|
|                |          | ΔE (eV)                            | F    | ΔE (eV)                            | F    | ΔE (eV)                | f    |
| S <sub>1</sub> | ππ* (La) | 5.13                               | 0.19 | 5.17                               | 0.19 | 5.23                   | 0.18 |
| S <sub>2</sub> | ππ* (Lb) | 5.72                               | 0.46 | 5.71                               | 0.46 | 5.71 (S <sub>3</sub> ) | 0.45 |

Notes: a) distance from the carbonyl oxygen 2.3 Å. b) distance from the carbonyl oxygen 2.7 Å.

**Figure S1.** Computed Absorption Spectra (a) for a representative tetrad (b) varying the distance between the central ion (Na<sup>+</sup> in blue and K<sup>+</sup> in red) and the centre of the tetrad computed at the TD-PCM-M052X/6-31G\*/M052X/6-31G\* level of theory.

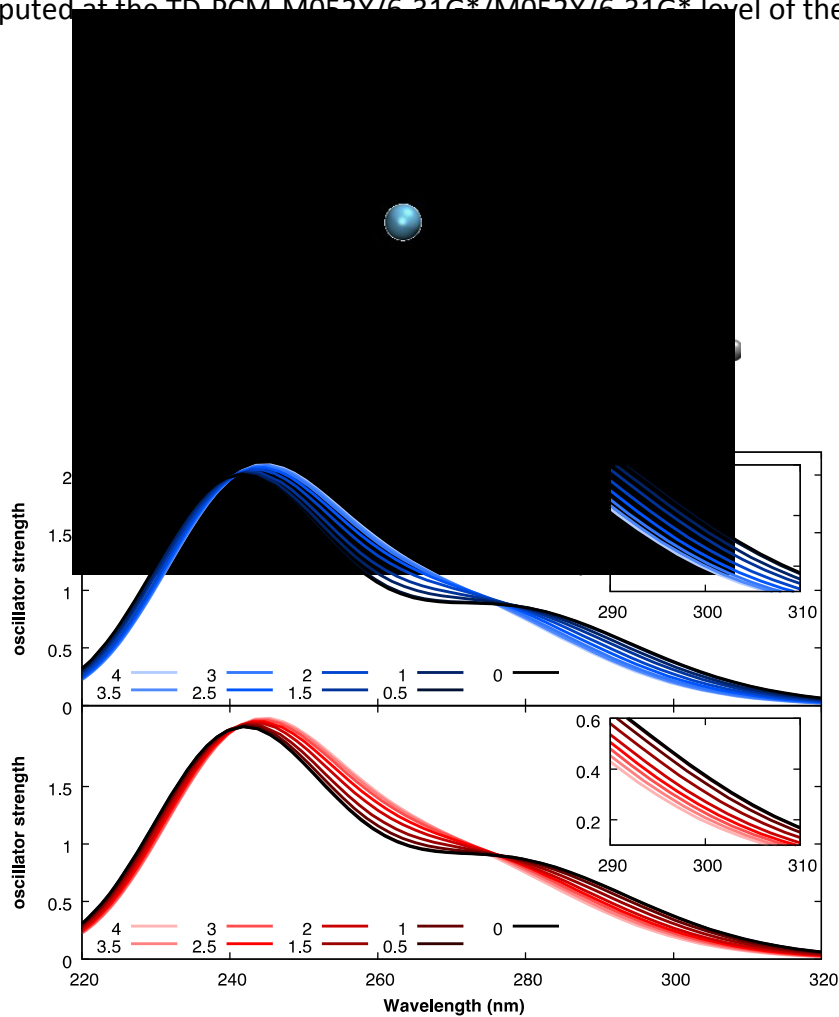

Supplement: d0pp00065e1.pdf [file d0pp00065e1.pdf]
